# Supplementary material
Source: Elsevier journal article supplement (https://www.sciencedirect.com/science/article/pii/S1699258X14000412)
Supplement: mmc1 [file S1699258X14000412:mmc1.pdf]

**GOBIERNO  
FEDERAL**

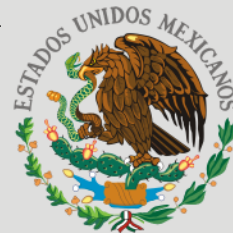

**SALUD**

**SEDENA**

**SEMAR**

GUÍA DE PRÁCTICA CLÍNICA **GPC**

**Atención del paciente con  
OSTEOARTROSIS  
DE CADERA Y RODILLA  
en el primer nivel de atención**

**Evidencias y recomendaciones**

Catálogo maestro de guías de práctica clínica: **SSA-053-08**

**CONSEJO DE  
SALUBRIDAD GENERAL**

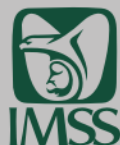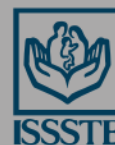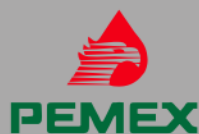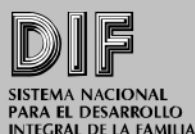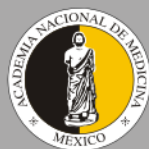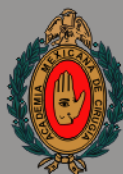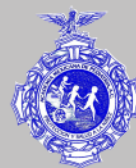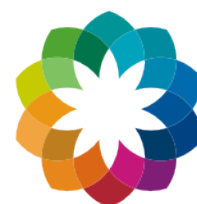

**Vivir Mejor**

Ave. Reforma No.450 piso 13 Colonia Juárez,  
Delegación Cuauhtémoc, 06600 México, DF.

[www.cenetec.salud.gob.mx](http://www.cenetec.salud.gob.mx)

Publicado por CENETEC

© Copyright CENETEC.

Editor General

Centro Nacional de Excelencia Tecnológica en Salud

Esta guía de práctica clínica fue elaborada con la participación de las instituciones que conforman el Sistema Nacional de Salud, bajo la coordinación del Centro Nacional de Excelencia Tecnológica en Salud. Los autores han hecho un esfuerzo por asegurarse que la información aquí contenida sea completa y actual; por lo que asumen la responsabilidad editorial por el contenido de esta Guía, que incluye evidencias y recomendaciones y declaran que no tienen conflicto de intereses.

Las recomendaciones son de carácter general, por lo que definen un curso único de conducta en un procedimiento o tratamiento. Las variaciones de las recomendaciones aquí establecidas al ser aplicadas en la práctica, deberán basarse en el juicio clínico de quien lo emplea como referencia, así como en las necesidades específicas y las preferencias de cada paciente en particular; los recursos disponibles al momento de la atención y la normatividad establecida en cada institución o área de práctica.

Este documento puede reproducirse libremente sin autorización escrita, con fines de enseñanza y actividades no lucrativas, dentro del Sistema Nacional de Salud.

Deberá ser citado como: Guía de Práctica Clínica: **Atención del paciente con osteoartrosis de cadera y rodilla en el Primer Nivel de atención,**

México: Secretaría de Salud; 2008.

Esta Guía puede ser descargada de Internet en:

[www.cenetec.salud.gob.mx/interior/gpc.html](http://www.cenetec.salud.gob.mx/interior/gpc.html)

## Atención del paciente con osteoartrosis de cadera y rodilla en el primer nivel de atención

### CIE 10: XIII Enfermedades del sistema osteomuscular y del tejido conjuntivo M00-M99 M-16 Coxartrosis, M-17 Gonartrosis

#### Coordinador

|                                 |                                            |                     |                                                                                                                  |
|---------------------------------|--------------------------------------------|---------------------|------------------------------------------------------------------------------------------------------------------|
| Dr. Juan Manuel Guzmán González | Médico<br>Medicina Física y Rehabilitación | Secretaría de Salud | Director de Área<br>Secretariado Técnico del Consejo<br>Nacional para las personas con<br>Discapacidad (CONADIS) |
|---------------------------------|--------------------------------------------|---------------------|------------------------------------------------------------------------------------------------------------------|

#### Autores

|                                       |                                                                                                    |                                                                                 |                                                                                                                                                |
|---------------------------------------|----------------------------------------------------------------------------------------------------|---------------------------------------------------------------------------------|------------------------------------------------------------------------------------------------------------------------------------------------|
| Dra. Mariana García Ortiz             | Médico<br>Maestría en Ciencias en Salud<br>Pública, con área de<br>concentración en Epidemiología. | Secretaría de Salud                                                             | Subdirectora de Área<br>Secretariado Técnico del Consejo Nacional para<br>las Personas con Discapacidad (CONADIS)                              |
| Dra. Ma. Del Carmen García Peña       | Médico<br>Medicina Familiar                                                                        | Academia Nacional de Medicina                                                   | Académico de número<br>Sillón Medicina Familiar                                                                                                |
| Dra. Ma. Elva García Salazar          | Médico<br>Medicina Física y Rehabilitación                                                         | Asociación Médica<br>Latinoamericana de<br>Rehabilitación (AMLAR)               | Secretaria                                                                                                                                     |
| Dra. Susana González Ramírez          | Médico<br>Medicina Física y Rehabilitación                                                         | Sociedad Mexicana de Medicina<br>Física y Rehabilitación, A. C.                 | Presidente                                                                                                                                     |
| Dr. Juan Manuel Guzmán González       | Médico<br>Medicina Física y Rehabilitación                                                         | Secretaría de Salud                                                             | Director de Área<br>Secretariado Técnico del Consejo Nacional para<br>las Personas con Discapacidad (CONADIS)                                  |
| Dra. Blanca Estela Hernández<br>Leyva | Médico<br>Medicina Familiar                                                                        | Instituto Mexicano del Seguro<br>Social                                         | Unidad de Investigación Epidemiológica y en<br>Servicios de Salud                                                                              |
| Dra. Guadalupe Melgoza González       | Médico<br>Medicina Física y Rehabilitación                                                         | Instituto Mexicano del Seguro<br>Social                                         | Jefe de Área<br>División de Infraestructura Médica<br>Coordinación de Planeación e Infraestructura<br>Médicas                                  |
| Dr. José Javier Osorio Salcido        | Médico<br>Medicina del Deporte                                                                     | Secretaría de Salud                                                             | Secretario Técnico<br>Secretariado Técnico del Consejo Nacional para<br>las Personas con Discapacidad (CONADIS)                                |
| Dr. Ricardo Pérez Cuevas              | Médico Familiar<br>Maestría en Administración en<br>Servicios de Salud                             | Instituto Mexicano del Seguro<br>Social                                         | Unidad de Investigación Epidemiológica y en<br>Servicios de Salud                                                                              |
| Dra. Martha Cecilia Ruiz<br>Lozano    | Médico<br>Medicina Física y Rehabilitación                                                         | Instituto de Seguridad Social al<br>Servicios de los Trabajadores del<br>Estado | Dirección Médica<br>Subdirección de Regulación y Atención<br>Hospitalaria<br>Jefatura de Servicios de Medicina Especializada<br>y Hospitalaria |
| Dr. Jesús Solórzano Martínez          | Médico<br>Medicina Física y Rehabilitación                                                         | Instituto Mexicano del Seguro<br>Social                                         | Jefe de Área<br>División de Rehabilitación Coordinación de<br>Áreas Médicas                                                                    |
| <b>Validación Interna</b>             |                                                                                                    |                                                                                 |                                                                                                                                                |
| Dra. Verónica López Roldán            | Médico<br>Medicina Física y Rehabilitación                                                         | Instituto Mexicano del Seguro<br>Social                                         | Jefe del Área de Reincorporación Laboral<br>Coordinación de Salud en el Trabajo                                                                |
| <b>Revisión Interinstitucional</b>    |                                                                                                    |                                                                                 |                                                                                                                                                |
| Dr. Alfonso Servín Álvarez            | Medicina Física y Rehabilitación                                                                   | División de Rehabilitación CAM,<br>IMSS                                         | División de Rehabilitación<br>Coordinación de Áreas Médicas                                                                                    |
| Dr. Luis Cabrera Sedeño               | Medicina Física y Rehabilitación                                                                   | División de Rehabilitación CAM,<br>IMSS                                         | División de Rehabilitación<br>Coordinación de Áreas Médicas                                                                                    |

## ÍNDICE

|                                                    |    |
|----------------------------------------------------|----|
| 1. Clasificación.....                              | 5  |
| 2. Preguntas a responder por esta guía.....        | 6  |
| 3. Aspectos generales.....                         | 6  |
| 3.1 Justificación.....                             | 6  |
| 3.2 Objetivo de esta guía.....                     | 8  |
| 3.3 Definición.....                                | 8  |
| 4. Evidencias y recomendaciones.....               | 9  |
| 4.1. Detección.....                                | 10 |
| 4.1.1 Factores de riesgo.....                      | 10 |
| 4.1.2 Historia clínica.....                        | 11 |
| 4.2 Tratamiento.....                               | 12 |
| 4.2.1 Tratamiento no farmacológico.....            | 12 |
| 4.2.1.1 Medios físicos.....                        | 13 |
| 4.2.1.2 Reducción de peso.....                     | 14 |
| 4.2.1.3 Ejercicio terapéutico.....                 | 14 |
| 4.2.1.4 Electroterapia.....                        | 16 |
| 4.2.1.5 Suplementos alimenticios.....              | 17 |
| 4.2.2 Tratamiento farmacológico.....               | 18 |
| 4.2.2.1 Analgésicos orales.....                    | 18 |
| 4.2.2.1 Analgésicos tópicos.....                   | 24 |
| 4.3 Ayudas técnicas y ortesis.....                 | 25 |
| 4.4 Referencia a segundo nivel.....                | 26 |
| 5. Anexos.....                                     | 27 |
| 6. Bibliografía.....                               | 28 |
| 7. Agradecimientos.....                            | 29 |
| 8. Comité académico.....                           | 30 |
| 9. Directorio.....                                 | 31 |
| 10. Comité Nacional Guías de Práctica Clínica..... | 32 |

## ATENCIÓN DEL PACIENTE CON OSTEOARTROSIS DE CADERA Y RODILLA EN EL PRIMER NIVEL DE ATENCIÓN

### 1. CLASIFICACIÓN

|                                                               |                                                                                                                                                                                                                                                                                                                                                                                                                                                                                                                                                                                                                                                                                                                                                                                                                                                                                                                                                                                                                                                                                                                                                                                                                                            |                                                                                                                                         |                                                                     |
|---------------------------------------------------------------|--------------------------------------------------------------------------------------------------------------------------------------------------------------------------------------------------------------------------------------------------------------------------------------------------------------------------------------------------------------------------------------------------------------------------------------------------------------------------------------------------------------------------------------------------------------------------------------------------------------------------------------------------------------------------------------------------------------------------------------------------------------------------------------------------------------------------------------------------------------------------------------------------------------------------------------------------------------------------------------------------------------------------------------------------------------------------------------------------------------------------------------------------------------------------------------------------------------------------------------------|-----------------------------------------------------------------------------------------------------------------------------------------|---------------------------------------------------------------------|
| <b>Profesionales de la salud que participa en la atención</b> | Médico familiar<br>Médico general                                                                                                                                                                                                                                                                                                                                                                                                                                                                                                                                                                                                                                                                                                                                                                                                                                                                                                                                                                                                                                                                                                                                                                                                          | Ortopedista<br>Especialistas en medicina física y rehabilitación                                                                        | Residentes de medicina familiar<br>Médicos de pregrado<br>Enfermera |
| <b>Clasificación de la enfermedad</b>                         | XIII Enfermedades del Sistema Osteomuscular y del Tejido Conjuntivo M00-M99<br>M16 Coxartrosis; M17 Gonartrosis. De acuerdo a la Clasificación Estadística Internacional de Enfermedades y Problemas Relacionados con la Salud. Décima revisión, CIE 10                                                                                                                                                                                                                                                                                                                                                                                                                                                                                                                                                                                                                                                                                                                                                                                                                                                                                                                                                                                    |                                                                                                                                         |                                                                     |
| <b>Categoría de GPC</b>                                       | Primer nivel de atención                                                                                                                                                                                                                                                                                                                                                                                                                                                                                                                                                                                                                                                                                                                                                                                                                                                                                                                                                                                                                                                                                                                                                                                                                   | Diagnóstico oportuno<br>Prevención secundaria<br>Educación en salud                                                                     |                                                                     |
| <b>Usuarios potenciales</b>                                   | Tomadores de decisiones en salud<br>Médicos familiares<br>Médicos generales<br>Médicos ortopedistas<br>Médicos especialistas en rehabilitación                                                                                                                                                                                                                                                                                                                                                                                                                                                                                                                                                                                                                                                                                                                                                                                                                                                                                                                                                                                                                                                                                             | Enfermeras especializadas<br>Enfermeras generales<br>Personal médico en formación<br>Personal médico y de enfermería en servicio social | Técnicos en enfermería<br>Padres de familia                         |
| <b>Tipo de organización desarrolladora</b>                    | Gobierno Federal<br>Secretaría de Salud<br>Secretariado Técnico del Consejo Nacional para las personas con Discapacidad<br>Instituto Mexicano del Seguro Social<br>Instituto de Seguridad Social al Servicio de los Trabajadores del Estado<br>Sociedad Mexicana de Medicina Física y Rehabilitación. A. C.                                                                                                                                                                                                                                                                                                                                                                                                                                                                                                                                                                                                                                                                                                                                                                                                                                                                                                                                |                                                                                                                                         |                                                                     |
| <b>Población blanco</b>                                       | Pacientes adultos con osteoartritis de cadera y de rodilla; se excluyen los casos de osteoartrosis con otra localización anatómica.                                                                                                                                                                                                                                                                                                                                                                                                                                                                                                                                                                                                                                                                                                                                                                                                                                                                                                                                                                                                                                                                                                        |                                                                                                                                         |                                                                     |
| <b>Fuente de financiamiento/ Patrocinador</b>                 | Gobierno Federal<br>Secretaría de Salud                                                                                                                                                                                                                                                                                                                                                                                                                                                                                                                                                                                                                                                                                                                                                                                                                                                                                                                                                                                                                                                                                                                                                                                                    |                                                                                                                                         |                                                                     |
| <b>Intervenciones y actividades consideradas</b>              | Evaluación de los factores de riesgo de osteoartrosis y<br>Tratamiento en la consulta externa en el primer nivel de atención<br>Indicaciones de referencia a médico especialista (Segundo Nivel)                                                                                                                                                                                                                                                                                                                                                                                                                                                                                                                                                                                                                                                                                                                                                                                                                                                                                                                                                                                                                                           |                                                                                                                                         |                                                                     |
| <b>Impacto esperado en salud</b>                              | Tratamiento de la osteoartrosis de cadera y rodilla<br>Referencia oportuna                                                                                                                                                                                                                                                                                                                                                                                                                                                                                                                                                                                                                                                                                                                                                                                                                                                                                                                                                                                                                                                                                                                                                                 |                                                                                                                                         |                                                                     |
| <b>Metodología</b>                                            | Definición del enfoque de la Guía de Práctica Clínica<br>Elaboración de preguntas clínicas<br>Métodos empleados para coleccionar y seleccionar evidencia<br>Protocolo sistematizado de búsqueda<br>Revisión sistemática de la literatura<br>Búsquedas de bases de datos electrónicas<br>Búsqueda de guías en centros elaboradores o compiladores<br>Búsqueda manual de la literatura<br>Número de Fuentes documentales revisadas: 20<br>Guías seleccionadas: cinco del periodo 2000-2008 ó actualizaciones realizadas en este período<br>Revisiones sistemáticas: cero<br>Ensayos controlados aleatorizados: 11<br>Reporte de casos: cero<br>Validación del protocolo de búsqueda<br>Adopción de guías de práctica clínica internacionales: Cinco<br>Selección de las guías que responden a las preguntas clínicas formuladas con información sustentada en evidencia<br>Construcción de la guía para su validación<br>Respuesta a preguntas clínicas por adopción de guías<br>Análisis de evidencias y recomendaciones de las guías adoptadas en el contexto nacional<br>Respuesta a preguntas clínicas por revisión sistemática de la literatura y gradación de evidencia y recomendaciones<br>Emisión de evidencias y recomendaciones * |                                                                                                                                         |                                                                     |
| <b>Método de validación</b>                                   | Método de validación de la Guía de Práctica Clínica: Validación por pares clínicos<br>Validación interna: Dra. Verónica López Roldán<br>Validación externa : Academia Mexicana de Cirugía                                                                                                                                                                                                                                                                                                                                                                                                                                                                                                                                                                                                                                                                                                                                                                                                                                                                                                                                                                                                                                                  |                                                                                                                                         |                                                                     |
| <b>Conflicto de interés</b>                                   | Todos los miembros del grupo de trabajo han declarado la ausencia de conflictos de interés                                                                                                                                                                                                                                                                                                                                                                                                                                                                                                                                                                                                                                                                                                                                                                                                                                                                                                                                                                                                                                                                                                                                                 |                                                                                                                                         |                                                                     |
| <b>Registro y actualización</b>                               | REGISTRO SSA-053-08, Febrero de 2009    FECHA DE ACTUALIZACIÓN 2011                                                                                                                                                                                                                                                                                                                                                                                                                                                                                                                                                                                                                                                                                                                                                                                                                                                                                                                                                                                                                                                                                                                                                                        |                                                                                                                                         |                                                                     |

## 2. PREGUNTAS A RESPONDER POR ESTA GUÍA

Con la finalidad de brindar oportunamente la atención al paciente con osteoartrosis de cadera y rodilla en el primer nivel de atención, debemos responder las siguientes preguntas:

1. ¿El médico de primer nivel puede diagnosticar oportunamente la osteoartrosis de cadera y rodilla?
2. ¿Cuál es el manejo no farmacológico de la osteoartrosis de cadera y rodilla?
3. ¿Cuál es el tratamiento farmacológico que se debe prescribir en la osteoartrosis de cadera y rodilla?
4. ¿Cuáles son los aditamentos para la marcha recomendados al paciente con osteoartrosis de cadera y rodilla?
5. ¿Cuáles son las actividades físicas recomendadas al paciente con osteoartrosis?
6. ¿Cuáles son las indicaciones de antiinflamatorios no esteroideos en el paciente con osteoartrosis de cadera y rodilla?
7. ¿Cuáles son los signos y síntomas que orientan para la referencia al segundo nivel de atención?

## 3. ASPECTOS GENERALES

### 3.1 JUSTIFICACIÓN

La osteoartrosis u osteoartritis es la forma más común de artritis y una de las principales causas de dolor y discapacidad reportadas a nivel mundial.

Esta entidad se ubica dentro de los ocho padecimientos mundiales no fatales y representa el sexto lugar (2.8%) de años de vida con discapacidad secundarios a enfermedad. *Woolf and Pfelger 2003*.

Cualquier articulación sinovial puede desarrollar osteoartrosis, sin embargo las rodillas, la cadera y las pequeñas articulaciones son los sitios más afectados. En Holanda, la prevalencia en adultos con osteoartrosis de cadera es del 14% y de rodilla del 27%. La incidencia de consulta al primer nivel de atención por dolor en rodilla es aproximadamente del 10% por año en adultos de más de 50 años. *Jordan et al. 2006*.

El impacto en los servicios de salud es grande, ya que cada año, dos millones de adultos visitan al médico general por osteoartrosis. *Arthritis Research Campaign 2000*. En España la osteoartrosis de rodilla ocupa el 10% de la consulta en el primer nivel de atención. En nuestro país, la osteoartrosis en mujeres ocupa el sexto lugar como causa de años de vida saludable perdidos, con 2.3 años.

Para comprender la magnitud del impacto médico de la osteoartrosis en la salud individual y social de la persona que la presenta, es necesario conocer la historia natural del padecimiento, pues una vez que se inicia la reparación del tejido degenerado, se produce un incremento en la actividad celular, dando lugar a la producción de un nuevo tejido articular.

La osteoartrosis es considerado un síndrome, cursa con un lento proceso de reparación tisular que produce alteración estructural en la articulación afectada (pérdida articular cartilaginosa y remodelación del hueso adyacente con neoformación ósea), generalmente su inicio clínico es asintomático y evoluciona hacia el dolor una vez que se ha limitado el movimiento articular por la presencia del nuevo tejido, restringiendo la funcionalidad y la calidad de vida del individuo en su participación social.

En México se debe considerar la atención de la osteoartrosis en el primer nivel debido a que es importante causal de discapacidad en el adulto por la presencia de dolor articular, limitación funcional y disminución en la calidad de vida.

La osteoartrosis de cadera, puede progresar hasta el reemplazo articular en un periodo aproximado de uno a cinco años, los casos diagnosticados radiológicamente en la fase asintomática y tratados en forma oportuna, generalmente no lo requerirán.

El impacto económico de la osteoartrosis es alto. En el año 2000, se reportaron en Europa cerca de 44 mil reemplazos de cadera y 35 mil de rodilla, con un costo de 405 millones de euros. En el Reino Unido, el costo estimado de gastos por osteoartrosis equivale al 1% del gasto nacional y solamente 1 de cada 200 que ha recibido beneficios por incapacidad, regresan a trabajar, implicando para estos países en los años 1999-2000, 36 millones de días de trabajo perdidos por osteoartrosis y un estimado de 31.2 billones de libras en pérdidas de producción. *Arthritis and Musculoskeletal Alliance 2004*.

La edad de consulta más frecuente es de 45-75 años o mayores. (*Jordan et al. 2007*), por lo que la osteoartrosis afecta predominantemente al adulto mayor y frecuentemente coexisten otras condiciones asociadas con la edad, como la obesidad, enfermedades cardiovasculares y diabetes, lo que ofrece un pronóstico incierto, que dependerá de la comorbilidad y del estado de salud del paciente, así como de la misma enfermedad articular.

El primer nivel de atención en nuestro país, se limita al diagnóstico tardío (cuando se presenta dolor o limitación funcional) y a la referencia al servicio de rehabilitación, conformando esto el principal problema en la atención de la osteoartrosis.

El grupo de trabajo de la presente guía de práctica clínica, pretende brindar una herramienta que sirva para la unificación de criterios en la prevención, diagnóstico oportuno y tratamiento en el primer nivel, así como su referencia al segundo nivel de atención y al servicio de rehabilitación, para reducir de manera importante las secuelas potencialmente discapacitantes por esta patología.

### 3.2 OBJETIVO DE ESTA GUÍA

La guía de práctica clínica ***Atención del Paciente con Osteoartrosis de Cadera y Rodilla en el Primer Nivel de atención***, forma parte de las guías que integrarán el catálogo maestro de guías de práctica clínica, el cual se instrumentará a través del Programa de Acción Específico de Guías de Práctica Clínica, de acuerdo con las estrategias y líneas de acción que considera el Programa Sectorial de Salud 2007-2012.

La finalidad de este catálogo, es establecer un referente nacional para orientar la toma de decisiones clínicas basadas en recomendaciones sustentadas en la mejor evidencia disponible.

Esta guía pone a disposición del personal del primer nivel de atención, las recomendaciones basadas en la mejor evidencia disponible con la intención de estandarizar las acciones nacionales para:

- Proporcionar la mejor y actual evidencia médica disponible para la atención del paciente con osteoartrosis de cadera y de rodilla en el primer nivel de atención, con el fin de limitar el daño por la enfermedad, así como prevenir las secuelas potencialmente discapacitantes en la población afectada.

Lo que favorecerá la mejora en la efectividad, seguridad y calidad de la atención médica, contribuyendo de esta manera al bienestar de las personas y de las comunidades, que constituye el objetivo central y la razón de ser de los servicios de salud.

### 3.3 DEFINICIÓN

La osteoartrosis u osteoartritis (OA) de cadera y rodilla, es un síndrome crónico y degenerativo, que se caracteriza por pérdida progresiva del cartílago articular en su inicio, seguida de cambios reactivos en los márgenes articulares y afección del hueso subcondral, lentamente progresiva, presentándose principalmente en articulaciones de carga. Estos cambios pueden incluir acumulación de líquidos, crecimiento óseo excesivo así como debilitamiento de los músculos. Se manifiesta clínicamente por la presencia de dolor, rigidez y aumento de volumen articular con disminución de la movilidad y limitación funcional, repercutiendo directamente en la calidad de vida y con un impacto social y económico. Es la forma más común de artritis y una causa mundial de dolor y discapacidad en los adultos.

## 4. EVIDENCIAS Y RECOMENDACIONES

Las recomendaciones señaladas en esta guía son producto del análisis de las guías de práctica clínica internacionales seleccionadas mediante el modelo de revisión sistemática de la literatura.

La presentación de la evidencia y las recomendaciones expresadas en las guías seleccionadas, corresponden a la información disponible organizada según criterios relacionados con las características cuantitativas, cualitativas, de diseño y tipo de resultados de los estudios que la originaron.

Los niveles de las evidencias y la gradación de las recomendaciones se mantienen respetando la fuente original consultada, marcada en cursivas. Las evidencias se clasifican de forma numérica y las recomendaciones con letras; ambas, en orden decreciente de acuerdo a su fortaleza.

Tabla de referencia de símbolos empleados en esta guía:

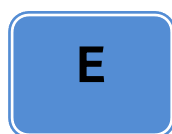

EVIDENCIA

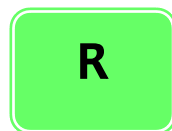

RECOMENDACIÓN

## 4.1. DETECCIÓN

### 4.1.1 FACTORES DE RIESGO

| Evidencia / Recomendación                                                                                                                                                                                                                                                                                                                                                                                                                                                                                            | Nivel / Grado                                                                                                   |
|----------------------------------------------------------------------------------------------------------------------------------------------------------------------------------------------------------------------------------------------------------------------------------------------------------------------------------------------------------------------------------------------------------------------------------------------------------------------------------------------------------------------|-----------------------------------------------------------------------------------------------------------------|
| <div data-bbox="126 604 293 730"><b>E</b></div> <p>La osteoartritis es un grupo de enfermedades comunes, con múltiples factores de riesgo:</p> <ul style="list-style-type: none"> <li>▪ Genéticos (40-60% para mano, rodilla y cadera) donde la responsabilidad genética aún no es conocida.</li> <li>▪ Factores constitucionales (envejecimiento, sexo femenino, obesidad, alta densidad ósea).</li> <li>▪ Factores biomecánicos (lesión articular, ocupacional, debilidad muscular, laxitud articular).</li> </ul> | <p><b>3a</b></p> <p>Revisión sistemática de estudios de casos y controles, con homogeneidad<br/>NCC-CC 2008</p> |
| <div data-bbox="138 1052 305 1178"><b>E</b></div> <p>Muchos factores de riesgo para la osteoartritis como los ambientales o los estilos de vida, son reversibles. Ej. Obesidad, debilidad muscular. Otros son evitables. Ej. Ocupacionales.</p>                                                                                                                                                                                                                                                                      | <p><b>3a</b></p> <p>Revisión sistemática de estudios de casos y controles, con homogeneidad<br/>NCC-CC 2008</p> |
| <div data-bbox="138 1356 305 1482"><b>E</b></div> <p>Cada uno de los factores de riesgo para la osteoartritis, tiene importantes implicaciones para la prevención primaria y secundaria. Sin embargo, la importancia de los factores de riesgo varía de forma individual y difiere de acuerdo con el sitio articular afectado.</p>                                                                                                                                                                                   | <p><b>3a</b></p> <p>Revisión sistemática de estudios de casos y controles, con homogeneidad<br/>NCC-CC 2008</p> |

#### 4.1.2 HISTORIA CLÍNICA

|     | Evidencia / Recomendación                                                                                                                                                                                                                                                                                                                                              | Nivel / Grado                                                                                                                       |
|-----|------------------------------------------------------------------------------------------------------------------------------------------------------------------------------------------------------------------------------------------------------------------------------------------------------------------------------------------------------------------------|-------------------------------------------------------------------------------------------------------------------------------------|
|     | <p><b>E</b></p> <p>Los síntomas que se deben buscar son:</p> <ul style="list-style-type: none"> <li>▪ Dolor</li> <li>▪ Limitación de la movilidad</li> <li>▪ Restricciones en la actividad</li> </ul>                                                                                                                                                                  | <p><b>I b</b></p> <p>Ensayos Clínicos Aleatorizados individuales<br/><i>Jong 2004</i></p>                                           |
| CH1 | <p><b>R</b></p> <p>La evaluación inicial para la osteoartrosis, debe contener una historia detallada</p> <ul style="list-style-type: none"> <li>▪ Uso de aspirina</li> <li>▪ Medicamentos para el control del dolor</li> <li>▪ Limitaciones a la actividad</li> <li>▪ Examen físico.</li> </ul>                                                                        | <p><b>A</b></p> <p>Al menos un metanálisis, revisión sistemática o ensayo clínico clasificado como 1++<br/><i>Michigan 2005</i></p> |
| CH2 | <p><b>R</b></p> <p>La evaluación del riesgo gastrointestinal en las personas con osteoartrosis debe contener:</p> <ul style="list-style-type: none"> <li>▪ Historia de sangrado gastrointestinal</li> <li>▪ Historia de úlcera péptica o síntomas gastrointestinales inducidos por esteroides</li> <li>▪ Uso concomitante de corticoesteroides y warfarina.</li> </ul> | <p><b>A</b></p> <p>Al menos un metanálisis, revisión sistemática o ensayo clínico clasificado como 1++<br/><i>Michigan 2005</i></p> |
| CH3 | <p><b>R</b></p> <p>La evaluación del riesgo gastrointestinal en las personas con osteoartrosis debe contener:</p> <ul style="list-style-type: none"> <li>▪ Dosis altas o uso crónico de medicamentos no esteroideos (AINE's), incluyendo aspirina</li> <li>▪ Edad ≥60 años</li> </ul>                                                                                  | <p><b>B</b></p> <p>Un volumen de evidencia compuesta por estudios clasificados como 2++<br/><i>Michigan 2005</i></p>                |

## 4.2 TRATAMIENTO

### 4.2.1 TRATAMIENTO NO FARMACOLÓGICO

|      | Evidencia / Recomendación                                                                                                                                                                                                                                                                                                                                                                                                                                    | Nivel / Grado                                                                                                                                                                                                                      |
|------|--------------------------------------------------------------------------------------------------------------------------------------------------------------------------------------------------------------------------------------------------------------------------------------------------------------------------------------------------------------------------------------------------------------------------------------------------------------|------------------------------------------------------------------------------------------------------------------------------------------------------------------------------------------------------------------------------------|
|      | <p><b>E</b></p> <p>Las modalidades no farmacológicas de la terapia para el tratamiento de osteoartrosis de cadera y rodilla (ejercicio, reducción de peso y educación) es combinada en pacientes que están recibiendo tratamiento farmacológico con analgésicos o medicamentos no esteroideos (AINE's).</p>                                                                                                                                                  | <p><b>IV</b></p> <p>Consenso, informes de comités de expertos u opiniones con base a la difusión de la investigación<br/><i>OARSI 2008</i></p>                                                                                     |
|      | <p><b>E</b></p> <p>El tratamiento de rehabilitación debe iniciarse tan pronto se diagnostica la enfermedad y al mismo momento en que se inicia el tratamiento farmacológico.</p>                                                                                                                                                                                                                                                                             | <p><b>2+</b></p> <p>Estudios de cohortes o casos-control o estudios de pruebas diagnósticas bien realizados con bajo riesgo de sesgo y con una moderada probabilidad de establecer una relación causal<br/><i>Forero, 2002</i></p> |
| NPT1 | <p><b>R</b></p> <p>El cuidado y el tratamiento de la osteoartrosis deben tomar en cuenta a los pacientes, ofreciéndoles la oportunidad de tomar decisiones informadas acerca de su tratamiento y cuidado.</p>                                                                                                                                                                                                                                                | <p><b>A</b></p> <p>Al menos un meta-análisis, o ensayo clínico aleatorio o una revisión sistemática<br/><i>NICE 2008</i></p>                                                                                                       |
| NPT2 | <p><b>R</b></p> <p>El manejo óptimo de la osteoartrosis de cadera requiere de la combinación farmacológica y no farmacológica.</p>                                                                                                                                                                                                                                                                                                                           | <p><b>D</b></p> <p>Estudios con un nivel de evidencia IV<br/><i>EULAR 2005;OARSI 2008</i></p>                                                                                                                                      |
| NPT3 | <p><b>R</b></p> <p>La buena comunicación entre el profesional de la salud y los pacientes con osteoartrosis es esencial.</p>                                                                                                                                                                                                                                                                                                                                 | <p><b>A</b></p> <p>Al menos un meta-análisis, o ensayo clínico aleatorio o una revisión sistemática<br/><i>NICE 2008</i></p>                                                                                                       |
| NPT4 | <p><b>R</b></p> <p>Todos los pacientes con osteoartrosis de cadera y rodilla deberán tener acceso a la información y educación acerca de los objetivos del tratamiento y de la importancia de los cambios en su estilo de vida, ejercicio, reducción de peso y otras medidas para disminuir el daño de la articulación. El programa debe orientarse a la autoayuda. Subsecuentemente se debe hacer énfasis en la adherencia al régimen no farmacológico.</p> | <p><b>A</b></p> <p>Estudios con un nivel de evidencia 1 a o 1 b<br/><i>OARSI 2008</i></p>                                                                                                                                          |

NPT5

**R**

El plan de tratamiento de la osteoartrosis debe incluir:

- Educación y consejo con revisión de la reducción de peso y protección de la articulación.

**B**

Un volumen de evidencia compuesta por estudios clasificados como 2++

*Michigan 2005*

NPT6

**R**

El plan de tratamiento de la osteoartrosis debe incluir:

- Movilizaciones, ejercicios aeróbicos y de estiramiento muscular para pacientes con limitaciones funcionales, incluyendo la terapia física y ocupacional.
- Automanejo.

**D**

Evidencia de nivel 3-4 o evidencia extrapolada desde estudios 2++

*Michigan 2005*

#### 4.2.1 TRATAMIENTO NO FARMACOLÓGICO

##### 4.2.1.1 MEDIOS FÍSICOS

#### Evidencia/Recomendación

#### Nivel/Grado

**E**

Se ha usado la hidroterapia como medio físico para disminuir el dolor, incrementar los arcos de movilidad articular y evitar soporte de articulaciones lesionadas.

Estudios de cohortes o casos-control o estudios de pruebas diagnósticas bien realizados con bajo riesgo de sesgo y con una moderada probabilidad de establecer una relación causal.  
*Forero, 2002*

**2+**

NPT7

**R**

Los efectos de los medios físicos como el frío (crioterapia) y el calor (calor superficial) sobre Los tejidos deben ser considerados parte del tratamiento.

**C**

Un volumen de evidencia compuesta por estudios clasificados como 2+  
*Forero, 2002*

## ATENCIÓN DEL PACIENTE CON OSTEOARTROSIS DE CADERA Y RODILLA EN EL PRIMER NIVEL DE ATENCIÓN

### 4.2.1 TRATAMIENTO NO FARMACOLÓGICO

#### 4.2.1.2 REDUCCIÓN DE PESO

#### Evidencia/Recomendación

#### Nivel/Grado

NPT8

**R**

La base del tratamiento para osteoartrosis debe ser la reducción de peso cuando existe sobrepeso u obesidad.

**A**  
Al menos un meta-análisis, o ensayo clínico aleatorio o una revisión sistemática.  
*NCC-CC 2008*

NPT9

**R**

Los pacientes con osteoartrosis de cadera y rodilla con sobrepeso, deben ser estimulados a bajar de peso y mantenerse en los niveles bajos que corresponda a su condición.

**A**  
Estudios con un nivel de evidencia 1 a.  
*OARSI 2008*

### 4.2.1 TRATAMIENTO NO FARMACOLÓGICO

#### 4.2.1.3 EJERCICIO TERAPÉUTICO

#### Evidencia / Recomendación

#### Nivel / Grado

**E**

La actividad física puede afectar las articulaciones; sin embargo, con ejercicio supervisado, los pacientes con osteoartrosis pueden andar en bicicleta, nadar o ejercitarse en el gimnasio sin presentar molestias.

ECA individual.  
*NCC-CC 2008*

**1b**

E

La evidencia para osteoartrosis de rodilla, ha demostrado efectos benéficos de hacer ejercicio comparado con no hacerlo, incluyendo en este contexto a la caminata, fortalecimiento de cuádriceps en casa, estiramiento muscular en casa, ejercicio con pesas y dieta, más ejercicio de resistencia.

1++

Revisiones Sistemáticas de Ensayos Clínicos Aleatorizados o Ensayos Clínicos Aleatorizados con muy bajo riesgo de sesgos.  
NCC-CC 2008

E

En la osteoartrosis de rodilla, el tratamiento combinado de ejercicio y AINE's reduce el dolor, la limitación funcional y la toma de medicamentos (SF-36).

1++

Revisiones sistemáticas de ensayos clínicos aleatorizados o ensayos clínicos aleatorizados con muy bajo riesgo de sesgos.  
NCC-CC 2008

E

En la osteoartrosis de rodilla, la mayoría de los beneficios del ejercicio se puede observar mejoría a mediano o largo plazo.

1++

Revisiones sistemáticas de ensayos clínicos aleatorizados o ensayos clínicos aleatorizados con muy bajo riesgo de sesgos.  
NCC-CC 2008

E

Es frecuente la atrofia y debilidad muscular alrededor de las articulaciones lesionadas. Además la inactividad y las posiciones articulares inadecuadas llevan a alteraciones en el movimiento articular y en la fuerza muscular.

2++

Revisiones sistemáticas de estudios de cohortes o casos-control o de estudios de pruebas diagnósticas de alta calidad, estudios de cohortes o casos-control o de pruebas diagnósticas de alta claridad.  
Forero, 2002

R

Los ejercicios terapéuticos tienen como principio básico mejorar la resistencia y la fuerza muscular con la finalidad de proteger las articulaciones, mejorar la marcha, controlar el balance corporal y disminuir el dolor.

B

Un volumen de evidencia compuesta por estudios clasificados como 2++  
Forero, 2002

NPT10

## ATENCIÓN DEL PACIENTE CON OSTEOARTROSIS DE CADERA Y RODILLA EN EL PRIMER NIVEL DE ATENCIÓN

|       |          |                                                                                                                                                                                                                                                                                                                                |                                                                                                                          |
|-------|----------|--------------------------------------------------------------------------------------------------------------------------------------------------------------------------------------------------------------------------------------------------------------------------------------------------------------------------------|--------------------------------------------------------------------------------------------------------------------------|
| NPT11 | <b>R</b> | <p>El ejercicio debe ser prescrito en forma individual y ser supervisado, independientemente de la edad, comorbilidad, severidad del dolor o discapacidad. El ejercicio debe incluir:</p> <ul style="list-style-type: none"> <li>▪ Estiramiento muscular</li> <li>▪ Fortalecimiento</li> <li>▪ Aeróbicos en general</li> </ul> | <p><b>A</b></p> <p>Al menos un meta-análisis, o ensayo clínico aleatorio o una revisión sistemática.<br/>NCC-CC 2008</p> |
| NPT12 | <b>R</b> | <p>Los pacientes con osteoartrosis de cadera y rodilla deben efectuar ejercicio aeróbico de manera regular, estiramiento muscular y movilidad articular. Los ejercicios dentro del agua son efectivos para los pacientes.</p>                                                                                                  | <p><b>A</b></p> <p>Estudios con un nivel de evidencia 1 a o 1 b.<br/>NCC-CC 2008</p>                                     |

### 4.2.1 TRATAMIENTO NO FARMACOLÓGICO

#### 4.2.1.4 ELECTROTERAPIA

| Evidencia/Recomendación |                                                                                                                                                                                                                                         | Nivel/Grado                                                                                                                                                       |
|-------------------------|-----------------------------------------------------------------------------------------------------------------------------------------------------------------------------------------------------------------------------------------|-------------------------------------------------------------------------------------------------------------------------------------------------------------------|
| <b>E</b>                | <p>La <b>estimulación eléctrica transcutánea TENS</b>, es clínicamente benéfica para disminuir el dolor y reducir la rigidez en osteoartrosis de rodilla, especialmente en la de corta evolución.</p>                                   | <p><b>1++</b></p> <p>Metanálisis de gran calidad y revisiones sistemáticas de ECA.<br/>NCC-CC 2008</p>                                                            |
| <b>E</b>                | <p>El ultrasonido, las pulsaciones de campos electromagnéticos y el laser terapéutico no proveen beneficios más allá que el placebo u otro agente electro-terapéutico, para el tratamiento de la osteoartrosis de cadera y rodilla.</p> | <p><b>1++</b></p> <p>Metanálisis de gran calidad.<br/>NCC-CC 2008</p>                                                                                             |
| <b>E</b>                | <p>La evidencia de los beneficios de las pulsaciones de campos electromagnéticos para osteoartrosis, se limita a la osteoartrosis de rodilla.</p>                                                                                       | <p><b>1++</b></p> <p>Metanálisis de gran calidad y revisiones sistemáticas de ECA.<br/>NCC-CC 2008</p>                                                            |
| <b>E</b>                | <p>El personal para la atención de la salud debe evaluar al paciente con osteoartrosis, para seleccionar el tipo de terapia que se le va a prescribir.</p>                                                                              | <p><b>1++</b></p> <p>Revisiones sistemáticas de ensayos clínicos aleatorizados o ensayos clínicos aleatorizados con muy bajo riesgo de sesgos<br/>NCC-CC 2008</p> |

## ATENCIÓN DEL PACIENTE CON OSTEOARTROSIS DE CADERA Y RODILLA EN EL PRIMER NIVEL DE ATENCIÓN

**E**

La **estimulación eléctrica transcutánea TENS** es clínicamente benéfica para el alivio del dolor y reducción de la rigidez en la osteoartritis de rodilla.

**1++**

Metanálisis de gran calidad y Revisiones Sistemáticas de ECA.  
*NCC-CC 2008*

NPT13

**R**

Los profesionales para la atención de la salud deben considerar el uso de la estimulación eléctrica transcutánea en conjunto con el tratamiento base de AINE's y ejercicio, para el alivio del dolor, en la osteoartritis de cadera y rodilla.

**A**

Al menos un meta-análisis, o ensayo clínico aleatorio o una revisión sistemática.  
*NCC-CC 2008, OARSI 2008*

**E**

La acupuntura no ha mostrado evidencia de costo-efectividad en el tratamiento de osteoartritis.

**1++**

Metanálisis de gran calidad y Revisiones Sistemáticas de ECA  
*NCC-CC 2008*

NPT14

**R**

La electro-acupuntura no debe utilizarse para tratar personas con osteoartritis.

**A**

Al menos un meta-análisis, o ensayo clínico aleatorio o una revisión sistemática.  
*NCC-CC 2008*

### 4.2.1 TRATAMIENTO NO FARMACOLÓGICO

#### 4.2.1.5 SUPLEMENTOS ALIMENTICIOS

### Evidencia/Recomendación

### Nivel/Grado

**E**

Los estudios con sulfato de glucosamina y la glucosamina hidrocloreídica muestran menor beneficio comparada con placebo en la osteoartritis de rodilla.

**1a**

Revisión Sistemática de ECA, que incluya estudios con resultados comparables y en la misma dirección.  
*NCC-CC 2008*

**R**

El tratamiento para la osteoartritis de rodilla, con glucosamina y con el sulfato de condroitina, provee beneficios sintomáticos en el paciente con osteoartritis de rodilla. Si no hay respuesta aparente en seis meses de tratamiento, se debe discontinuar.

**A**

Estudios con nivel de evidencia 1 a.  
*OARSI 2008*

NPT15

## 4.2.2 TRATAMIENTO FARMACOLÓGICO

### 4.2.2.1 ANALGÉSICOS ORALES

| Evidencia/Recomendación                                                                                                                                                                                                                                                                        | Nivel/Grado                                                                                |
|------------------------------------------------------------------------------------------------------------------------------------------------------------------------------------------------------------------------------------------------------------------------------------------------|--------------------------------------------------------------------------------------------|
| <div data-bbox="139 516 305 638">E</div> <p>Todos los AINE's pueden antagonizar el efecto cardioprotector de la aspirina, en la osteoartritis.</p>                                                                                                                                             | <p>1+</p> <p>Ensayos clínicos aleatorizados con bajo riesgo de sesgos.<br/>NCC-CC 2008</p> |
| <div data-bbox="139 684 305 806">E</div> <p>Existe diferencia entre la respuesta individual del paciente con osteoartritis, la elección entre AINE's y COX-2 es influenciado por los efectos secundarios, tendiendo a favor de COX-2. En cuestión de costos, se orienta a favor de AINE's.</p> | <p>1+</p> <p>Ensayos clínicos aleatorizados con bajo riesgo de sesgos.<br/>NCC-CC 2008</p> |
| <div data-bbox="139 932 305 1054">E</div> <p>En la osteoartritis, todos los AINE's tienen la propensión de causar retención de líquidos y de agravar la hipertensión; sin embargo, este efecto es mayor para otros agentes (eterocoxib).</p>                                                   | <p>1+</p> <p>Ensayos clínicos aleatorizados con bajo riesgo de sesgos.<br/>NCC-CC 2008</p> |
| <div data-bbox="139 1213 305 1335">E</div> <p>En la osteoartritis, los COX-2 son identificados como agentes en estudios de larga duración que incrementan el riesgo protrombótico (incluyendo infarto al miocardio y EVC) siendo identificado por dosis respuesta.</p>                         | <p>1+</p> <p>Ensayos clínicos aleatorizados con bajo riesgo de sesgos.<br/>NCC-CC 2008</p> |
| <div data-bbox="139 1440 305 1562">E</div> <p>Los estudios han demostrado el incremento de riesgo cardiovascular de agentes como diclofenaco, con alta selectividad de COX-2, para la osteoartritis.</p>                                                                                       | <p>1+</p> <p>Ensayos clínicos aleatorizados con bajo riesgo de sesgos.<br/>NCC-CC 2008</p> |
| <div data-bbox="139 1707 305 1829">E</div> <p>En la osteoartritis, existe una diferencia consistente entre eterocoxib 60 mg y otras drogas del modelo, eligiendo a este, en su mayoría como tratamiento de primera elección.</p>                                                               | <p>1+</p> <p>Ensayos clínicos aleatorizados con bajo riesgo de sesgos.<br/>NCC-CC 2008</p> |

|     |          |                                                                                                                                                                                                                                                                                                                                                                                                                                                                      |                                                                                                                                     |
|-----|----------|----------------------------------------------------------------------------------------------------------------------------------------------------------------------------------------------------------------------------------------------------------------------------------------------------------------------------------------------------------------------------------------------------------------------------------------------------------------------|-------------------------------------------------------------------------------------------------------------------------------------|
| PT1 | <b>R</b> | <p>Cuando se da tratamiento en la osteoartritis, con AINE's orales o inhibidores de COX-2, se debe prescribir con un inhibidor de la bomba de protones, escogiendo siempre el de menor costo de adquisición.</p>                                                                                                                                                                                                                                                     | <p><b>A</b></p> <p>Al menos un meta-análisis, o ensayo clínico aleatorio o una revisión sistemática.<br/><i>NCC-CC 2008</i></p>     |
| PT2 | <b>R</b> | <p>Todos los AINE's y COX-2 tienen efectos analgésicos en la osteoartritis, de similar magnitud pero varían en su potencial de complicación gastrointestinal, hepático o toxicidad cardiorenal. Es por eso que cuando se elija el agente y la dosis, el profesional de la salud debe tomar en cuenta los factores de riesgo individuales del paciente, incluyendo edad y comorbilidad. Se debe realizar adecuada evaluación o monitorear los factores de riesgo.</p> | <p><b>A</b></p> <p>Al menos un meta-análisis, o ensayo clínico aleatorio o una revisión sistemática.<br/><i>NCC-CC 2008</i></p>     |
| PT3 | <b>R</b> | <p>En la osteoartritis con riesgos para los AINE's, se debe agregar un inhibidor de la bomba de protones; si el AINE no es tolerado, entonces se indica un COX-2.</p>                                                                                                                                                                                                                                                                                                | <p><b>D</b></p> <p>Evidencia de nivel 3-4 o evidencia extrapolada desde estudios clasificados como 2+.<br/><i>Michigan 2005</i></p> |
| PT4 | <b>R</b> | <p>Cuando el paracetamol o un AINE tópico son ineficaces en el alivio del dolor para la osteoartritis, entonces se debe considerar adicionar un AINE oral o un inhibidor COX-2.</p>                                                                                                                                                                                                                                                                                  | <p><b>A</b></p> <p>Al menos un meta-análisis, o ensayo clínico aleatorio o una revisión sistemática.<br/><i>NCC-CC 2008</i></p>     |
| PT5 | <b>R</b> | <p>Los AINE's orales y los inhibidores de COX-2 deben usarse en la menor dosis efectiva por periodos de corto tiempo.</p>                                                                                                                                                                                                                                                                                                                                            | <p><b>A</b></p> <p>Al menos un meta-análisis, o ensayo clínico aleatorio o una revisión sistemática.<br/><i>NCC-CC 2008</i></p>     |
| PT6 | <b>R</b> | <p>En la osteoartritis con riesgos para los AINE's y que tengan sangrado gastrointestinal, se eliminan los AINE's, debiendo usarse el COX-2 mas el inhibidor de la bomba de protones.</p>                                                                                                                                                                                                                                                                            | <p><b>D</b></p> <p>Evidencia de nivel 3-4 o evidencia extrapolada desde estudios clasificados como 2+<br/><i>Michigan 2005</i></p>  |
| PT7 | <b>R</b> | <p>En pacientes con osteoartritis de cadera o rodilla sintomática, los AINE's deben usarse a dosis mínima efectiva en el menor tiempo posible, con un gastroprotector. Se debe tener mucho cuidado en pacientes con riesgo de enfermedades cardiovasculares (CV) en la prescripción de AINE's.</p>                                                                                                                                                                   | <p><b>A</b></p> <p>Estudios con un nivel de evidencia 1 a.<br/><i>OARSI 2008</i></p>                                                |

## ATENCIÓN DEL PACIENTE CON OSTEOARTROSIS DE CADERA Y RODILLA EN EL PRIMER NIVEL DE ATENCIÓN

|     |          |                                                                                                                                                                                                                                                       |                                                                                                                                                                                              |
|-----|----------|-------------------------------------------------------------------------------------------------------------------------------------------------------------------------------------------------------------------------------------------------------|----------------------------------------------------------------------------------------------------------------------------------------------------------------------------------------------|
|     | <b>E</b> | En la osteoartritis sin riesgos cardiovasculares o con bajo riesgo a los AINE's, se debe indicar AINE's, adicionando un inhibidor de la bomba de protones en el caso de la aspirina, además de ofrecer la garantía gastroprotectora.                  | <b>D</b><br>Evidencia de nivel 3-4 o evidencia extrapolada desde estudios clasificados como 2+<br><i>Michigan 2005</i>                                                                       |
|     | <b>E</b> | La evidencia que soporta el uso de opioides como analgesia en osteoartritis es pobre.                                                                                                                                                                 | <b>2+</b><br>Estudios de cohortes o casos-control o de estudios realizados con bajo riesgo de sesgo y con una moderada probabilidad de establecer una relación causal.<br><i>NCC-CC 2008</i> |
|     | <b>E</b> | El uso de opioides en osteoartritis causa efectos secundarios como constipación, náusea, vómito, somnolencia y confusión.                                                                                                                             | <b>2+</b><br>Estudios de cohortes o casos-control o de estudios realizados con bajo riesgo de sesgo y con una moderada probabilidad de establecer una relación causal.<br><i>NCC-CC 2008</i> |
| PT8 | <b>R</b> | No existe evidencia que soporte el uso de derivados tricíclicos para el dolor de osteoartritis.                                                                                                                                                       | <b>2+</b><br>Estudios de cohortes o casos-control o de estudios realizados con bajo riesgo de sesgo y con una moderada probabilidad de establecer una relación causal. <i>NCC-CC 2008</i>    |
| PT9 | <b>R</b> | El uso de opiodes débiles y analgésicos narcóticos se puede recomendar en el tratamiento del dolor refractario en pacientes con osteoartritis de cadera y rodilla, cuando otros agentes farmacológicos no han sido efectivos o están contraindicados. | <b>A</b><br>Estudios con nivel de evidencia I a.<br><i>OARSI 2008</i>                                                                                                                        |
|     | <b>E</b> | El uso de opioides fuertes está indicado para manejar el dolor severo de la OA, y sólo en circunstancias excepcionales.                                                                                                                               | <b>D</b><br>Estudios con nivel de evidencia IV.<br><i>OARSI 2008</i>                                                                                                                         |
|     | <b>E</b> | Existe suficiente evidencia de la eficacia del paracetamol en la osteoartritis de rodilla, con menor evidencia que soporte el uso de este medicamento en otras articulaciones.                                                                        | <b>2+</b><br>Estudios de cohortes o casos-control o de estudios realizados con bajo riesgo de sesgo y con una moderada probabilidad de establecer una relación causal.<br><i>NCC-CC 2008</i> |

## ATENCIÓN DEL PACIENTE CON OSTEOARTROSIS DE CADERA Y RODILLA EN EL PRIMER NIVEL DE ATENCIÓN

|      |          |                                                                                                                                                                                                                                        |                                                                                                                        |
|------|----------|----------------------------------------------------------------------------------------------------------------------------------------------------------------------------------------------------------------------------------------|------------------------------------------------------------------------------------------------------------------------|
| PT10 | <b>R</b> | El paracetamol debe considerarse en el tratamiento de la osteoartritis, después o en continuidad de AINE's, COX-2 u opioides.                                                                                                          | <b>A</b><br>Al menos un meta-análisis, o ensayo clínico aleatorio o una revisión sistemática.<br><i>NCC-CC 2008</i>    |
| PT11 | <b>R</b> | En el uso de analgésicos opioides se debe considerar los riesgos y los beneficios particularmente en los adultos mayores.                                                                                                              | <b>A</b><br>Al menos un meta-análisis, o ensayo clínico aleatorio o una revisión sistemática.<br><i>NCC-CC 2008</i>    |
| PT12 | <b>R</b> | La dosis inicial de elección en la osteoartritis, es acetaminofén 4 g/día, modificando la dosis por paciente con riesgo de toxicidad (factores de riesgo de toxicidad hepática, especialmente aquellos con aspirina)                   | <b>D</b><br>Evidencia de nivel 3-4 o evidencia extrapolada desde estudios clasificados como 2+<br><i>Michigan 2005</i> |
|      | <b>E</b> | Los profesionales para la atención de la salud, deben considerar prescribir paracetamol para disminuir el dolor de la osteoartritis de rodilla a dosis regulares, además del tratamiento base (bajar peso, información, estiramiento). | <b>A</b><br>Al menos un meta-análisis, o ensayo clínico aleatorio o una revisión sistemática.<br><i>NCC-CC 2008</i>    |
|      | <b>E</b> | Estudios reportan importante reducción de dolor en la osteoartritis, con COX-2, comparado con placebo, en periodos de 6 a 12 semanas.<br>▪ Eterocoxib 30-60mg<br>▪ Celecoxib 200mg<br>▪ Meloxicam 7.5 o 15 mg                          | <b>1+</b><br>Ensayos clínicos aleatorizados con bajo riesgo de sesgos.<br><i>NCC-CC 2008</i>                           |
|      | <b>E</b> | Se reporta importante reducción de dolor en la osteoartritis, con inhibidores de COX-2, en periodos de seis semanas a seis meses.                                                                                                      | <b>1+</b><br>Ensayos clínicos aleatorizados con bajo riesgo de sesgos.<br><i>NCC-CC 2008</i>                           |
|      | <b>E</b> | Los estudios reportan mejoría en el dolor y en la rigidez en la osteoartritis, con inhibidores de COX-2, en periodos de 15 días a seis meses.                                                                                          | <b>1+</b><br>Ensayos clínicos aleatorizados con bajo riesgo de sesgos.<br><i>NCC-CC 2008</i>                           |

**E**

Estudios reportan mejoría en la medición global de la eficacia y función de la cadera y rodilla en favor de los COX-2

**1+**

Ensayos clínicos aleatorizados con bajo riesgo de sesgos.  
NCC-CC 2008

**E**

La evidencia reporta en términos de mejora de la función física de la osteoartritis de cadera y rodilla, a favor de los COX-2 en comparación con placebo, en tratamiento de 12 semanas,

**1+**

Ensayos clínicos aleatorizados con bajo riesgo de sesgos.  
NCC-CC 2008

**E**

Para la osteoartritis de cadera y rodilla, se encontraron diferencias significativas entre los inhibidores COX-2 y los AINE's no selectivos, en términos de calidad de vida a los seis meses de tratamiento en adultos.

**1+**

Ensayos clínicos aleatorizados con bajo riesgo de sesgos.  
NCC-CC 2008

- Meloxicam comparado con piroxicam
- Meloxicam comparado con diclofenaco sódico.

**E**

La evidencia reporta que los inhibidores de COX-2 presentan menor porcentaje de complicaciones gastrointestinales con los AINE's, en el tratamiento de la osteoartritis de cadera y rodilla.

**1+**

Ensayos clínicos aleatorizados con bajo riesgo de sesgos.  
NCC-CC 2008

**E**

Los inhibidores de COX-2 reportan mayor porcentaje de complicaciones Cardiovasculares, comparado con tratamiento de AINE's.

**1+**

Ensayos clínicos aleatorizados con bajo riesgo de sesgos.  
NCC-CC 2008

**E**

Se reporta incremento significativo en los valores de urea, en el grupo COX-2.

**1+**

Ensayos clínicos aleatorizados con bajo riesgo de sesgos.  
NCC-CC 2008

**E**

Con COX-2 se tiene menor porcentaje de edema e hipertensión y menor porcentaje de incremento de valores anormales hepáticos comparados con el grupo diclofenaco.

**1+**

Ensayos clínicos aleatorizados con bajo riesgo de sesgos.  
NCC-CC 2008

**E**

Los COX-2 producen **complicaciones gastrointestinales GI**, como dispepsia, úlceras y sangrado, comparado con placebo.

**1+**

Ensayos clínicos aleatorizados con bajo riesgo de sesgos.  
NCC-CC 2008

## ATENCIÓN DEL PACIENTE CON OSTEOARTROSIS DE CADERA Y RODILLA EN EL PRIMER NIVEL DE ATENCIÓN

**E**

La evidencia reporta en términos de mejora de la función física, dolor y rigidez de cadera y rodilla, a favor de los inhibidores COX-2 en comparación con placebo.

**1+**

Ensayos clínicos aleatorizados con bajo riesgo de sesgos.  
*NCC-CC 2008*

**E**

El Celecoxib en dosis de 100 mg tiene mejora significativa en la función de la osteoartritis severa de rodilla, comparada con naproxeno en un periodo de 12-14 semanas

**1+**

Ensayos clínicos aleatorizados con bajo riesgo de sesgos.  
*NCC-CC 2008*

**E**

Los estudios de osteoartritis de rodilla reportan daño renal, con tratamiento de COX-2, con un alto porcentaje de edema periférico e hipertensión que entre los tratados con Naproxeno o Placebo

**1+**

Ensayos clínicos aleatorizados con bajo riesgo de sesgos.  
*NCC-CC 2008*

**E**

Con diclofenaco se tuvieron cambios significativos en valores renales en comparación con el placebo, en osteoartritis de rodilla.

**1+**

Ensayos clínicos aleatorizados con bajo riesgo de sesgos.  
*NCC-CC 2008*

**R**

Como otros agentes farmacológicos de la osteoartritis se recomienda:

- Salicilato no acetilado
- Tramadol
- Opioides
- Glucocorticoides o hialuronato
- Capsaicina o metilsalicilato

**B**

Un volumen de evidencia (compuesta por estudios clasificados como 2++).  
*Michigan 2005*

PT13

## 4.2.2 TRATAMIENTO FARMACOLÓGICO

### 4.2.2.1 ANALGÉSICOS TÓPICOS

#### Evidencia / Recomendación

#### Nivel / Grado

**E**

Los AINE's tópicos son costo efectivos en la osteoartritis de rodilla, dado que previenen o evitan los efectos adversos serios provocados por los AINE's orales.

**1++**

Ensayos clínicos aleatorizados con muy bajo riesgo de sesgos.  
*NCC-CC 2008*

**E**

Un estudio con tres meses de seguimiento, encontró al diclofenaco tópico en dimetil sulfoxida, ser equivalente con diclofenaco sódico oral, para osteoartritis de rodilla después de los tres meses.

**1++**

Ensayos clínicos aleatorizados con muy bajo riesgo de sesgos.  
*NCC-CC 2008*

**R**

En la terapia tópica de osteoartritis, se recomienda capsaicina.

**B**

Un volumen de evidencia compuesta por estudios clasificados como 2++  
*Michigan 2005*

**R**

Los profesionales de la salud, deben considerar prescribir AINE's tópicos para aliviar el dolor de osteoartritis de rodilla en combinación con un tratamiento base (educación, baja de peso, ejercicio de estiramiento).

**A**

Al menos un meta-análisis, o ensayo clínico aleatorio o una revisión sistemática.  
*NCC-CC 2008*

**R**

Los AINE's tópicos y el paracetamol deben considerarse junto con el tratamiento base (educación, baja de peso, estiramiento muscular para osteoartritis de rodilla).

**A**

Al menos un meta-análisis, o ensayo clínico aleatorio o una revisión sistemática.  
*NCC-CC 2008*

## ATENCIÓN DEL PACIENTE CON OSTEOARTROSIS DE CADERA Y RODILLA EN EL PRIMER NIVEL DE ATENCIÓN

|      |          |                                                                                                                                                                    |                                                                                                                     |
|------|----------|--------------------------------------------------------------------------------------------------------------------------------------------------------------------|---------------------------------------------------------------------------------------------------------------------|
| PT17 | <b>R</b> | La capsaicina y los analgésicos tópicos como los AINE's pueden ser efectivos en adición de analgésicos y anti-inflamatorios orales, para osteoartrosis de rodilla. | <b>A</b><br>Estudios con un nivel de evidencia I a.<br><i>OARSI 2008</i>                                            |
| PT18 | <b>R</b> | La capsaicina tópica debe considerarse junto con el tratamiento base (educación, baja de peso, estiramiento muscular) para osteoartrosis de rodilla.               | <b>A</b><br>Al menos un meta-análisis, o ensayo clínico aleatorio o una revisión sistemática.<br><i>NCC-CC 2008</i> |
| PT19 | <b>R</b> | Los rubefacientes tópicos (salicilato de trolamina y salicilato de cobre) no son recomendados para el tratamiento de osteoartrosis.                                | <b>A</b><br>Al menos un meta-análisis, o ensayo clínico aleatorio o una revisión sistemática.<br><i>NCC-CC 2008</i> |

### 4.3 AYUDAS TÉCNICAS Y ORTESIS

| Evidencia / Recomendación |          | Nivel / Grado                                                                                                                                                                                                                                                                                                                                                                                                 |
|---------------------------|----------|---------------------------------------------------------------------------------------------------------------------------------------------------------------------------------------------------------------------------------------------------------------------------------------------------------------------------------------------------------------------------------------------------------------|
|                           |          | 2+                                                                                                                                                                                                                                                                                                                                                                                                            |
|                           | <b>E</b> | Las ortesis compensan la limitación articular, alivian el dolor y promueven la independencia funcional.<br><br>Estudios de cohortes o casos-control o estudios de pruebas diagnósticas bien realizados con bajo riesgo de sesgo con una moderada probabilidad de establecer una relación causal.<br><i>Forero 2002</i>                                                                                        |
| TAO1                      | <b>R</b> | <b>C</b><br>Las ortesis que se prescriban deberán ser confortables, fáciles de usar y que realmente mejoren la función deseada, siempre ajustadas a las necesidades propias del paciente.<br><br>Un volumen de evidencia compuesta por estudios clasificados como 2+<br><i>Forero, 2002</i>                                                                                                                   |
| TAO2                      | <b>R</b> | <b>D</b><br>Los auxiliares para caminar, reducen el dolor en pacientes con OA de cadera y rodilla. Los pacientes deben ser provistos de instrucciones para el uso óptimo del bastón en la mano contra lateral de la articulación afectada o muletas. Las andaderas con ruedas, se recomiendan en el caso de que la afección sea bilateral.<br><br>Estudios con un nivel de evidencia IV.<br><i>OARSI 2008</i> |

## ATENCIÓN DEL PACIENTE CON OSTEOARTROSIS DE CADERA Y RODILLA EN EL PRIMER NIVEL DE ATENCIÓN

TAO3 **R** Cada paciente con osteoartrosis de cadera y rodilla debe ser orientado acerca del uso de calzado apropiado. **D**  
Estudios con un nivel de evidencia IV.  
OARSI 2008

TAO4 **R** En pacientes con osteoartrosis de rodilla con *varo* o *valgo* medio/moderado, el uso de férula de rodilla puede reducir el dolor, mejorar la estabilidad y disminuir el riesgo de caída. **A**  
Estudios con un nivel de evidencia I a.  
OARSI 2008

TAO5 **R** En pacientes con osteoartrosis de rodilla, el uso de plantillas puede reducir el dolor y mejorar la deambulación. Las plantillas correctivas (con cuña lateral), son benéficas para disminuir la sintomatología de los pacientes con osteoartrosis de rodilla y alteraciones tibio-femorales. **A**  
Estudios con un nivel de evidencia I a.  
OARSI 2008

### 4.4 REFERENCIA A SEGUNDO NIVEL

|             | Evidencia / Recomendación                                                                                                                                                                                                                                                                                                                                                                                                                                                                                                                                  | Nivel / Grado                                                    |
|-------------|------------------------------------------------------------------------------------------------------------------------------------------------------------------------------------------------------------------------------------------------------------------------------------------------------------------------------------------------------------------------------------------------------------------------------------------------------------------------------------------------------------------------------------------------------------|------------------------------------------------------------------|
| RI <b>R</b> | Los pacientes sintomáticos clase funcional III y IV (ARA) con osteoartrosis de cadera y rodilla, deben ser referidos al servicio de rehabilitación para la evaluación y prescripción de un programa individualizado por el médico especialista en medicina física y rehabilitación a base de modalidades terapéuticas como electroterapia y ejercicio terapéutico, con la finalidad de reducir el dolor y mejorar la capacidad funcional. El resultado exitoso del programa de rehabilitación puede evitar el uso de auxiliares como bastones y andaderas. | <b>D</b><br>Estudios con un nivel de evidencia IV.<br>OARSI 2008 |
| R2 <b>R</b> | Los pacientes con osteoartrosis de cadera y rodilla que no hayan obtenido un adecuado alivio del dolor y de mejora del funcionamiento con la combinación de tratamiento farmacológico y no farmacológico, deben considerar un remplazo articular quirúrgico.                                                                                                                                                                                                                                                                                               | <b>C</b><br>Estudios con un nivel de evidencia III<br>OARSI 2008 |

R3

R

El remplazo con artroplastías en osteoartrosis de cadera y rodilla, es efectivo y costo-efectivo para pacientes con síntomas significativos o limitaciones funcionales asociadas con una reducción de la calidad de vida. **C** Estudios con un nivel de evidencia III. *OARSI 2008*

## 5. ANEXOS

### Criterios de capacidad funcional en la osteoartritis (ARA)

| Clase funcional | Características clínicas                                                                           |
|-----------------|----------------------------------------------------------------------------------------------------|
| I               | Capacidad funcional normal                                                                         |
| II              | Dolor, limitación en una articulación sin limitación de las Actividades de la vida diaria          |
| III             | Dolor limitante                                                                                    |
| IV              | Dolor incapacitante para realizar actividades de la vida diaria, laboral, recreativa y de traslado |
| V               | Limitación para el autocuidado y la alimentación                                                   |

## 6. BIBLIOGRAFÍA

1. American College of Rheumatology Subcommittee on osteoarthritis Guidelines. *Recommendations for the Medical Management of osteoarthritis of the hip and knee*. Arthritis and Rheumatism. 2000; 43(9):1905-1915.
2. Arthritis Research Campaign. *Arthritis: the Big Picture*. London: Arthritis Research Campaign. 2002.
3. Arthritis and Musculoskeletal Alliance. *Standards of Care for People With osteoarthritis*. London: ARMA. 2004.
4. Barclay L, Vega Ch. *New Guidelines Issud for Management of Hip and Knee Osteoarthritis*. 2008. Disponible en: <http://www.medscape.com/viewarticle/570804?src=mp>
5. Boyd CM, Durer JD, Boulton Ch, Fried LP, Boulton L, Wu AW. *Clinical Practice Guidelines and Quality of Care for Older Patients with Multiple Comorbid Diseases. Implications for Pay for Performance*. JAMA. 2005; 294(6):716-724.
6. EULAR. *Italian consensus on EULAR recommendations 2005 for the Management of hip osteoarthritis*. Reumatismo, 2006; 58(4):301-309.
7. Forero JP, Muñoz-Urrego A. *Manejo de fisioterapia y rehabilitación en el tratamiento de la osteoartrosis de cadera, rodilla y mano*. Revista Colombiana de Reumatología. 2002; 9(1):35-40.
8. Jong ORW, Hopman-Rock M, Tak ECM, Klazinga NS. *An implementation study of two evidence based exercise and health education programmes for older adults with osteoarthritis of the knee and hip*. Health Education Research. 2004; 19(3):316-325.
9. Jordan JM, Helmick CG, Renner JB, Luta G, Dragomir AD, Woodard J, Fang F, Schwartz TA, Nelson AE, Abbate LM, Callahan LF, Kalsbeek WD, Hochberg MC. *Prevalence of Hip Symptoms and Radiographic and Symptomatic Hip Osteoarthritis in African Americans and Caucasians: The Johnson County Osteoarthritis Project*.
10. Jordan K, Clarke AM, Symmons DP et al. *Measuring Disease Prevalence: A Comparison of Musculoskeletal Disease Using four General practice Consultation Databases*. British Journal of General Practice 57. 2004; (534): 07-14.
11. Jordan K, Jinks C, Croft P. *A prospective study of the consulting behaviour of older people with knee pain*. British Journal of General Practice 56. 2006; 525: 269-76.
12. National Collaborating Centre for Chronic Conditions. *Osteoarthritis: National Clinical Guideline for Care and Management in adults*. London: Royal College of Physicians, 2008. Disponible en: [www.nice.org.uk/nicemedia/pdf/CG059FullGuideline.pdf](http://www.nice.org.uk/nicemedia/pdf/CG059FullGuideline.pdf)
13. NICE. *Osteoarthritis. The care and management of Osteoarthritis in adults*. 2008. National Institute for Health and Clinical Excellence 2008, Clinical Guideline 59. National Collaborating Centre for Chronic Conditions. Disponible en: [www.dh.gov.uk](http://www.dh.gov.uk) y en: [www.nice.org.uk/nicemedia/pdf/CG59NICEguideline.pdf](http://www.nice.org.uk/nicemedia/pdf/CG59NICEguideline.pdf)
14. Mazières B, Schmidely N, Hauselmann HJ, Martin-Mola E, Serni U, Verbruggen AA, Le Bars M. *Level of acceptability of EULAR Recommendations for the management of knee osteoarthritis by practitioners in different European Countries*. Ann Rheum Dis. 2005; 64:1158-1164.
15. Michigan Quality Improvement Consortium. *Medical Management of Adults with Osteoarthritis*. 2005. Disponible en: Michigan Quality Improvement Consortium Web site: [www.mqic.org](http://www.mqic.org)
16. OARSI. *Recommendations for the Management of Hip and Knee Osteoarthritis. Part I: Critical Appraisal of Existing Treatment Guidelines and Systematic Review of Current Research Evidence*. Osteoarthritis Cartilage. 2007; 15(9):981-1000.
17. OARSI. *Recommendations for the management of hip and knee osteoarthritis, Part II: OARSI evidence-based, expert consensus guidelines*. En: Osteoarthritis Cartilage. 2008 Feb; 16(2):137-62.
18. Price-Forbes AN, Callaghan R, Allen ME, Rowe IF, *On behalf of the West Midlands Rheumatology Services and Training Committee. A Regional Audit of the Use of COX-2 Selective Non-steroidal Anti-inflammatory Drugs (NSAIDs) in Rheumatology Clinics in the West Midlands, In Relation to NICE Guidelines*. Rheumatology 2005; 44:921-924.
19. *Recommendations for the Medical Management of Osteoarthritis of the Hip and Knee*. Arthritis & Rheumatism. 2000; 43(9):1905-1915.

20. Woolf AD, Pfleger B. *Burden of Major Musculoskeletal Conditions*. Bulletin of the World Health Organization. 2003; 81 (9): 646–56.
21. Zhang W et cols. *EULAR Evidence Based Recommendations for the Management of hip osteoarthritis report of a task force of the EULAR Standing Committee for International Clinical Studies Including Therapeutics.(ESCISIT)*. Academic Rheumatology, University of Nottingham, UK. Ann Rheum Dis. 2005; 64(5):669-681.

## 7. AGRADECIMIENTOS

Se agradece a las autoridades de la Comisión Coordinadora de Institutos Nacionales de Salud y Hospitales de Alta Especialidad y de la Dirección General de Coordinación de los Hospitales Federales de Referencia, las gestiones realizadas para que el personal adscrito al centro o grupo de trabajo que desarrolló la presente guía; asistiera a los eventos de capacitación en Medicina Basada en la Evidencia y temas afines, coordinados por el Centro Nacional de Excelencia Tecnológica en Salud

Así como la valiosa colaboración del grupo de trabajo de las diferentes instituciones que participaron en la elaboración del presente documento y cuyos nombres se encuentran anotados al principio de esta guía, además de la Sra. María del Rosario González Martínez, Bibliotecaria de la Unidad de Medicina Física y Rehabilitación, Región Norte del IMSS.

## 8. COMITÉ ACADÉMICO

### Centro Nacional de Excelencia Tecnológica en Salud

|                                             |                                                     |
|---------------------------------------------|-----------------------------------------------------|
| M. en A. María Luisa González Rétiz         | Directora General                                   |
| Dr. Esteban Hernández San Román             | Director de Evaluación de Tecnologías en Salud      |
| M. en A. María de Lourdes Dávalos Rodríguez | Coordinadora Sectorial de Guías de Práctica Clínica |
| Dr. Héctor González Jácome                  | Subdirector de guías de práctica clínica            |
| Lic. José Alejandro Martínez Ochoa          | Investigación documental                            |
| Lic. Ana María Otero Prieto                 | Comunicación y logística                            |
| Lic. Margarita Isela Rivera Ramos           | Diseño gráfico                                      |
| Ing. David Felipe Mares Silva               | Revisión editorial                                  |
| Ing. Laura Alejandra Vélez Ruíz Gaitán      | Revisión editorial                                  |
| Lic- Alejandra Thomé Martínez               | Revisión editorial                                  |

## 9. DIRECTORIO

### **Secretaría de Salud**

Dr. José Ángel Córdova Villalobos

**Secretario de Salud**

### **Instituto Mexicano del Seguro**

**Social / IMSS**

Mtro. Daniel Karam Toumeh

**Director General**

### **Instituto de Seguridad y Servicios**

**Sociales para los Trabajadores del**

**Estado / ISSSTE**

Lic. Miguel Ángel Yunes Linares

**Director General**

### **Sistema Nacional para el Desarrollo**

**Integral de la Familia / DIF**

Lic. María Cecilia Landerreche Gómez Morín

**Titular del organismo SNDIF**

### **Petróleos Mexicanos / PEMEX**

Dr. Jesús Federico Reyes Heróles González Garza

**Director General**

### **Secretaría de Marina**

Almirante Mariano Francisco Saynez Mendoza

**Secretario de Marina**

### **Secretaría de la Defensa Nacional**

General Guillermo Galván Galván

**Secretario de la Defensa Nacional**

### **Consejo de Salubridad General**

Dr. Enrique Ruelas Barajas

**Secretario del Consejo de Salubridad General**

### **Secretariado Técnico del Consejo Nacional para las personas Discapacidad**

Dr. José Javier Osorio Salcido.

**Secretario Técnico**

Lic. Francisco Cisneros Rivero

**Director de Coordinación, Planeación y Seguimiento**

Lic. Ernesto Rosas Barrientos

**Director de Fomento Normativo y Asuntos Jurídicos**

Arq. Taidé Buenfil Garza

**Subdirectora de Participación Ciudadana.**

Dr. Juan Manuel Guzmán González.

**Director Médico.**

Dra. Mariana García Ortiz

**Subdirector Médico**

## 10. COMITÉ NACIONAL GUÍAS DE PRÁCTICA CLÍNICA

|                                                                                                                                                                             |                                   |
|-----------------------------------------------------------------------------------------------------------------------------------------------------------------------------|-----------------------------------|
| Dra. Maki Esther Ortiz Domínguez<br><b>Subsecretaría de Innovación y Calidad y Presidenta del Comité Nacional de Guías de Práctica Clínica</b>                              | Presidenta                        |
| Dr. Mauricio Hernández Avila<br><b>Subsecretario de Prevención y Promoción de la Salud</b>                                                                                  |                                   |
| Dr. Julio Sotelo Morales<br><b>Titular de la Comisión Coordinadora de Institutos Nacionales de Salud y Hospitales de Alta Especialidad</b>                                  | Titular                           |
| Mtro. Salomón Chertorivski Woldenberg<br><b>Comisionado Nacional de Protección Social en Salud</b>                                                                          | Titular                           |
| Dr. Jorge Manuel Sánchez González<br><b>Secretario Técnico del Consejo Nacional de Salud</b>                                                                                | Titular                           |
| Dr. Octavio Amancio Chassin<br><b>Representante del Consejo de Salubridad General</b>                                                                                       | Titular                           |
| General de Brigada Médico Cirujano Víctor Manuel Rico Jaime<br><b>Director General de Sanidad Militar de la Secretaría de la Defensa Nacional</b>                           | Titular                           |
| CONTRALMIRANTE SSN MC Miguel Ángel López Campos<br><b>Director General Adjunto Interino de Sanidad Naval de la Secretaría de Marina, Armada de México</b>                   | Titular                           |
| Dr. Santiago Echevarría Zuno<br><b>Director Médico del Instituto Mexicano del Seguro Social</b>                                                                             | Titular                           |
| Dr. Carlos Tena Tamayo<br><b>Director Médico del Instituto de Seguridad y Servicios Sociales de los Trabajadores del Estado</b>                                             | Titular                           |
| Dr. Víctor Manuel Vázquez Zárate<br><b>Subdirector de Servicios de Salud de Petróleos Mexicanos</b>                                                                         | Titular                           |
| Lic. Ma. de las Mercedes Gómez Mont Urueta<br><b>Directora General de Rehabilitación y Asistencia Social del Sistema Nacional para el Desarrollo Integral de la Familia</b> | Titular                           |
| Dr. Germán Enrique Fajardo Dolci<br><b>Comisionado Nacional de Arbitraje Médico</b>                                                                                         | Titular                           |
| Dr. Jorge E. Valdez García<br><b>Director General de Calidad y Educación en Salud</b>                                                                                       | Titular                           |
| Dr. Francisco Garrido Latorre<br><b>Director General de Evaluación del Desempeño</b>                                                                                        | Titular                           |
| Dra. Gabriela Villarreal Levy<br><b>Directora General de Información en Salud</b>                                                                                           | Titular                           |
| M en A María Luisa González Rétiz<br><b>Directora General del Centro Nacional de Excelencia Tecnológica en Salud</b>                                                        | Titular y suplente del presidente |
| Dr. Octavio Rodrigo Martínez Pérez<br><b>Director General de los Servicios de Salud en el Estado de Chihuahua</b>                                                           | Titular 2009-2010                 |
| Dra. Elvia E. Patricia Herrera Gutiérrez<br><b>Secretaría de Salud y Directora General de los Servicios de Salud del Estado de Durango</b>                                  | Titular 2009-2010                 |
| Dr. Ramón Armando Luna Escalante<br><b>Secretario de Salud y Director General de los Servicios de Salud en el Estado de Michoacán</b>                                       | Titular 2009-2010                 |
| Acad. Dr. Manuel H. Ruiz de Chávez Guerrero<br><b>Presidente de la Academia Nacional de Medicina</b>                                                                        | Titular                           |
| Acad. Dr. Jorge Elías Dib<br><b>Presidente de la Academia Mexicana de Cirugía</b>                                                                                           | Titular                           |
| Dra. Mercedes Juan<br><b>Presidente Ejecutivo de la Fundación Mexicana para la Salud</b>                                                                                    | Asesor Permanente                 |
| Dr. Jesús Eduardo Noyola Bernal<br><b>Presidente de la Asociación Mexicana de Facultades y Escuelas de Medicina</b>                                                         | Asesor Permanente                 |
| Mtro. Rubén Hernández Centeno<br><b>Presidente de la Asociación Mexicana de Hospitales</b>                                                                                  | Asesor Permanente                 |
| Dr. Roberto Simon Sauma<br><b>Presidente de la Asociación Nacional de Hospitales Privados</b>                                                                               | Asesor Permanente                 |
| Dr. Luis Miguel Vidal Pineda<br><b>Presidente de la Sociedad Mexicana de Calidad de Atención a la Salud</b>                                                                 | Asesor Permanente                 |
| Dr. Esteban Hernández San Román<br><b>Director de Evaluación de Tecnologías en Salud de CENETEC y Secretario Técnico del Comité Nacional de GPC</b>                         | Secretario Técnico                |
